# Supplementary material
Source: publisher site journal article supplement (https://www.dovepress.com/article/278844)
Supplement: Supplementary file 1 [file get_supplementary_file.php]

## Supplementary materials

### **Supplementary Figure 1: *MYC* is highly correlated with *EIF4A1* in G3-MB.**

The box plots showed the comparison of the log<sub>2</sub> transformed mRNA expression levels of eIF4F complex minor members between normal cerebella and different MB subtypes in dataset Pomeroy (n = 199) (A) or U133P2 (n = 305) (B). (C) The upper panel showed mean±sd of log<sub>2</sub> transformed values of *EIF4A1* from each subgroup as denoted, correlated with the *EIF4A1* panels of Figure 1C and 1D. The lower panel showed the log<sub>2</sub>FC difference values generated from the upper one, calculated by subtracting log<sub>2</sub>*EIF4A1* mean value of each subgroup from that of G3 within the same dataset. sd, standard deviation. (D) Scatterplots for the expression correlation of *MYC* with different subunits of eIF4F complex of MB patients in Cavalli dataset (n=763). ns, non-significant; \*,  $p < 0.05$ ; \*\*,  $p < 0.01$ ; \*\*\*,  $p < 0.001$ ; \*\*\*\*,  $p < 0.0001$ . Statistical tests used here are mentioned in materials and methods. (E) Kaplan-Meier analysis of Cavalli dataset by *EIF4A1* expression level within 5 years. The graph was generated directly from R2 website on query.

### **Supplementary Figure 2: Band intensity quantification of Figure 4A.**

(A) Bar plots of time courses of *MYC* expression ratios in drug treated G3-MB cell lines (upper panels). Band intensity was analyzed by Image J (Version 1.53a, NIH, USA). The ratios were generated over starting point after normalization by loading control (lower panel).

# Supplementary Figure 1

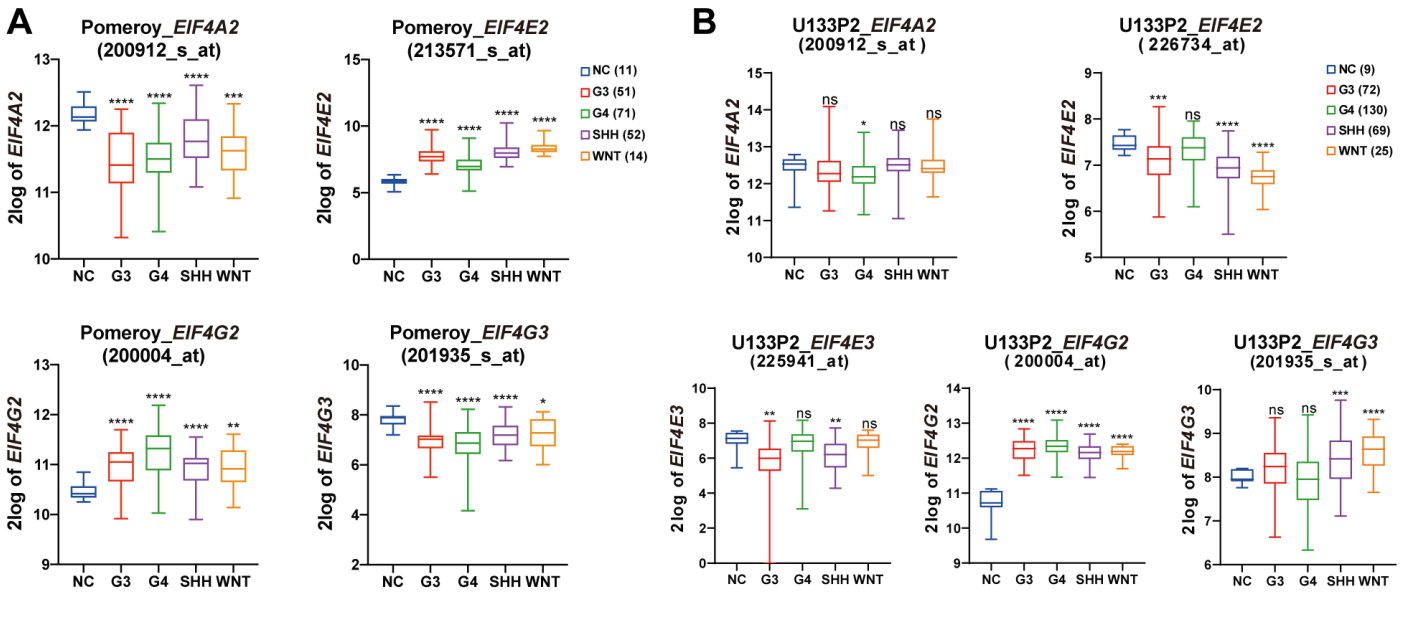

**C**

| log2EIF4A1 (mean±sd) | NC          | G3           | G4           | SHH          | WNT          |
|----------------------|-------------|--------------|--------------|--------------|--------------|
| Pomeroy              | 8.461±0.461 | 9.806±1.043  | 8.573±1.053  | 9.928±1.140  | 9.559±0.672  |
| U133P2               | 9.147±0.278 | 11.380±0.664 | 10.290±0.698 | 11.440±0.464 | 11.180±0.411 |

  

| log2FC diff. from G3 | G3    | NC    | G4    | SHH    | WNT   |
|----------------------|-------|-------|-------|--------|-------|
| Pomeroy              | 0.000 | 1.346 | 1.233 | -0.122 | 0.247 |
| U133P2               | 0.000 | 2.233 | 1.092 | -0.063 | 0.198 |

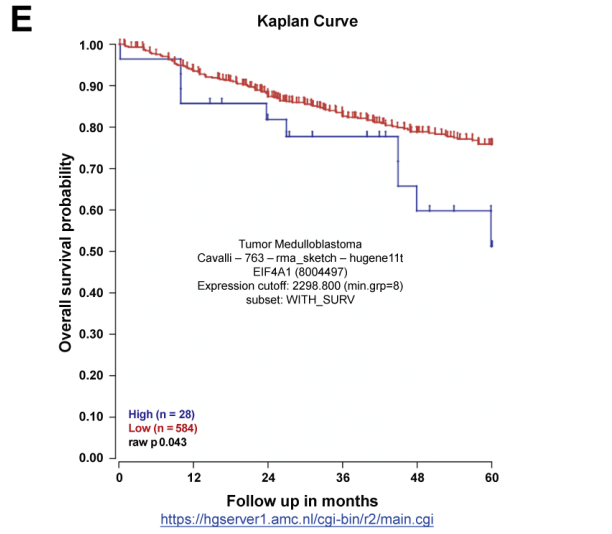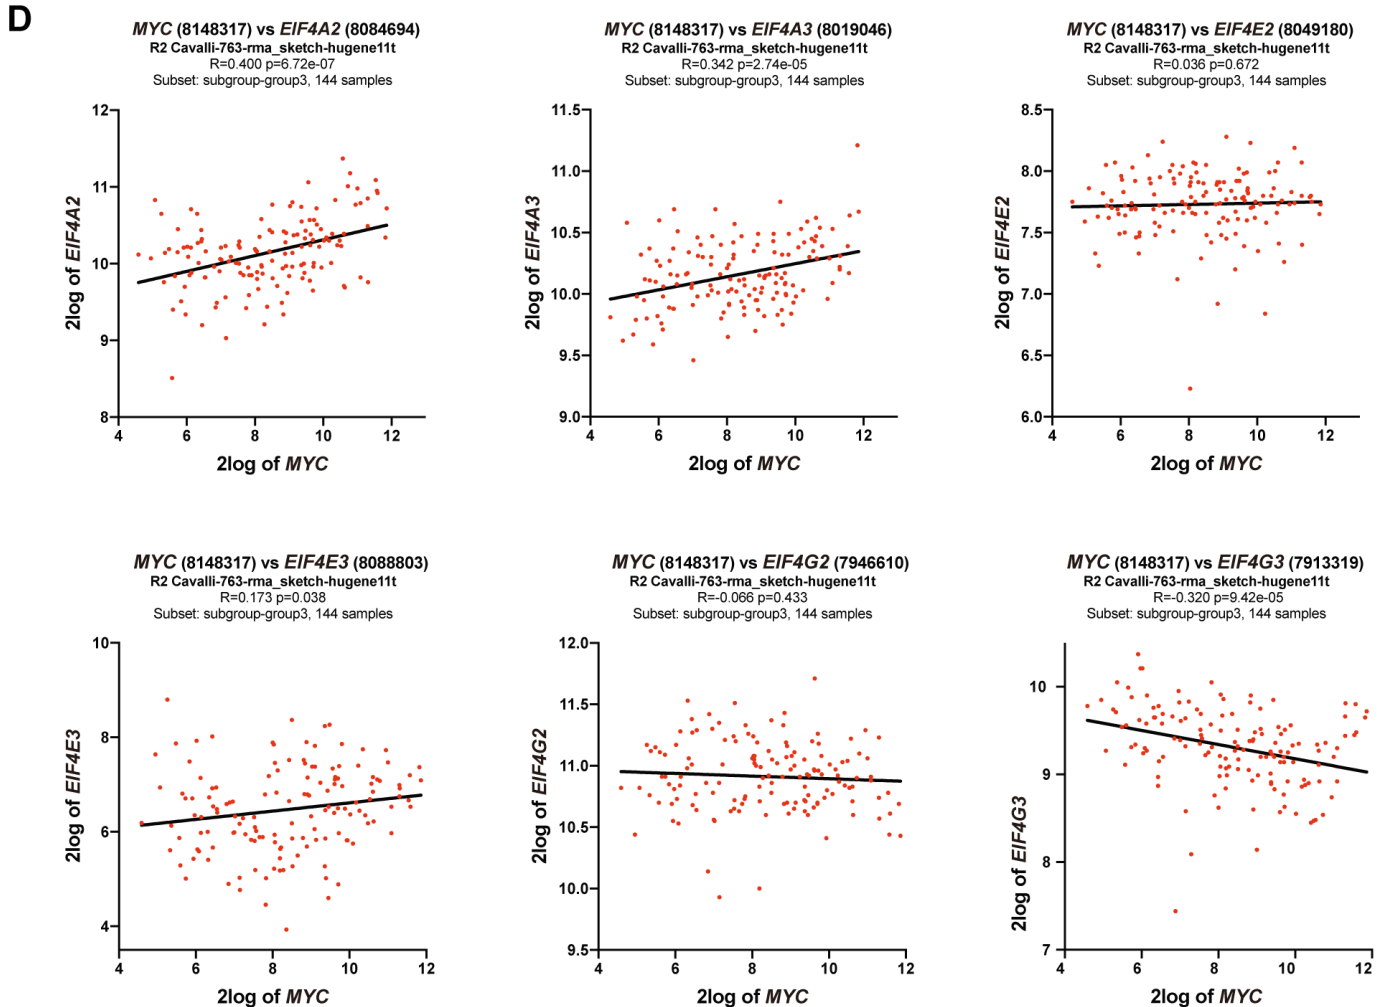

## Supplementary Figure 2

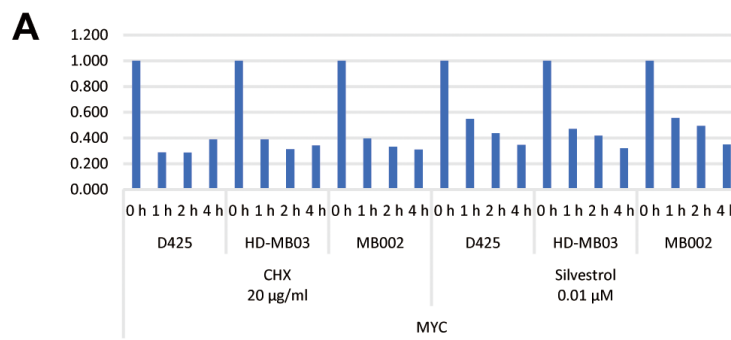

| MYC | CHX<br>20 µg/ml |       |       |       |         |       |       |       |       |       |       |       | Silvestrol<br>0.01 µM |       |       |       |         |       |       |       |       |       |       |       |
|-----|-----------------|-------|-------|-------|---------|-------|-------|-------|-------|-------|-------|-------|-----------------------|-------|-------|-------|---------|-------|-------|-------|-------|-------|-------|-------|
|     | D425            |       |       |       | HD-MB03 |       |       |       | MB002 |       |       |       | D425                  |       |       |       | HD-MB03 |       |       |       | MB002 |       |       |       |
|     | 0 h             | 1 h   | 2 h   | 4 h   | 0 h     | 1 h   | 2 h   | 4 h   | 0 h   | 1 h   | 2 h   | 4 h   | 0 h                   | 1 h   | 2 h   | 4 h   | 0 h     | 1 h   | 2 h   | 4 h   | 0 h   | 1 h   | 2 h   | 4 h   |
|     | 1.000           | 0.288 | 0.286 | 0.389 | 1.000   | 0.389 | 0.314 | 0.342 | 1.000 | 0.396 | 0.332 | 0.310 | 1.000                 | 0.549 | 0.437 | 0.347 | 1.000   | 0.472 | 0.418 | 0.321 | 1.000 | 0.556 | 0.493 | 0.350 |

**Supplementary Table 1 Nucleotide sequences used in this work**

| <b>Category</b> | <b>Name</b>       | <b>Sequence (5'-3')</b>                                     |
|-----------------|-------------------|-------------------------------------------------------------|
| <b>qPrimer</b>  | MYC-F             | AGAGTCTGGATCACCTTCTGCT                                      |
|                 | MYC-R             | ACACTGTCCAACCTTGACCCTCT                                     |
|                 | OTX2-F            | GCAGAGGTCCTATCCCATGA                                        |
|                 | OTX2-R            | CTGGGTGGAAAGAGAAGCTG                                        |
|                 | GAPDH-F           | TGACTTCAACAGCGACACCCA                                       |
|                 | GAPDH-R           | CACCCTGTTGCTGTAGCCAAA                                       |
| <b>sgRNA</b>    | sgCon-oligo-F     | CACCGGGGCGAGGAGCTGTTCAACCG                                  |
|                 | sgCon-oligo-R     | AAACCGGTGAACAGCTCCTCGCCCC                                   |
|                 | sgEIF4A1-oligo-F1 | CACCGCACTCGAGAATTGGCTCAGC                                   |
|                 | sgEIF4A1-oligo-R1 | AAACGCTGAGCCAATTCTCGAGTGC                                   |
|                 | sgEIF4A1-oligo-F2 | CACCGACAGGGAAAACCTATATCCAC                                  |
|                 | sgEIF4A1-oligo-R2 | AAACGTGGATATAGTTTTCCCTGTC                                   |
| <b>shRNA</b>    | shScr-oligo-F     | CCGGCCTAAGGTTAAGTCGCCCTCGCTCGAGCGAGGGCGACTTAACCTTAGGTTTTTG  |
|                 | shScr-oligo-R     | AATTCAAAAACCTAAGGTTAAGTCGCCCTCGCTCGAGCGAGGGCGACTTAACCTTAGG  |
|                 | shMYC-oligo-F     | CCGGCAGTTGAAACACAAACTTGAACCTCGAGTTCAAGTTTGTGTTTCAACTGTTTTTG |
|                 | shMYC-oligo-R     | AATTCAAAAACAGTTGAAACACAAACTTGAACCTCGAGTTCAAGTTTGTGTTTCAACTG |

**Supplementary Table 2 Down-regulated genes (DRG)**

| <b>Gene Symbol</b> |  |  |  |
|--------------------|--|--|--|
| <i>PRRC2C</i>      |  |  |  |
| <i>PPM1H</i>       |  |  |  |
| <i>NQO1</i>        |  |  |  |
| <i>CSDE1</i>       |  |  |  |
| <i>RPGRIP1L</i>    |  |  |  |
| <i>CLASP2</i>      |  |  |  |
| <i>POLR3E</i>      |  |  |  |
| <i>CHCHD2</i>      |  |  |  |
| <i>KIAA0391</i>    |  |  |  |
| <i>NES</i>         |  |  |  |
| <i>EBF1</i>        |  |  |  |
| <i>CACNA2D1</i>    |  |  |  |
| <i>MAX</i>         |  |  |  |
| <i>PKN2</i>        |  |  |  |
| <i>LARP1</i>       |  |  |  |
| <i>ZNF148</i>      |  |  |  |
| <i>STK24</i>       |  |  |  |
| <i>EIF4G1</i>      |  |  |  |
| <i>COPE</i>        |  |  |  |
| <i>KIAA1143</i>    |  |  |  |
| <i>POLR2B</i>      |  |  |  |
| <i>RNF20</i>       |  |  |  |
| <i>ANAPC5</i>      |  |  |  |
| <i>DHDDS</i>       |  |  |  |
| <i>LIMD1</i>       |  |  |  |
| <i>PPP1R9B</i>     |  |  |  |
| <i>SCAF4</i>       |  |  |  |
| <i>HSPA8</i>       |  |  |  |
| <i>VPS53</i>       |  |  |  |
| <i>SPAG5</i>       |  |  |  |
| <i>BSG</i>         |  |  |  |
| <i>SNAP23</i>      |  |  |  |
| <i>EYA3</i>        |  |  |  |
| <i>STAU1</i>       |  |  |  |
| <i>CCDC22</i>      |  |  |  |
| <i>RHBDD3</i>      |  |  |  |
| <i>MTDH</i>        |  |  |  |
| <i>IMPG2</i>       |  |  |  |
| <i>GNG12</i>       |  |  |  |
| <i>HK2</i>         |  |  |  |
| <i>ACLY</i>        |  |  |  |
| <i>PDCL3</i>       |  |  |  |
| <i>TOR1AIP2</i>    |  |  |  |
| <i>SPATS2L</i>     |  |  |  |
| <i>MOB1A</i>       |  |  |  |
| <i>HSPH1</i>       |  |  |  |
| <i>SREBF2</i>      |  |  |  |
| <i>DDHD2</i>       |  |  |  |
| <i>CLPTM1</i>      |  |  |  |

|                  |  |  |  |
|------------------|--|--|--|
| <i>ANK3</i>      |  |  |  |
| <i>UBE2S</i>     |  |  |  |
| <i>GGA2</i>      |  |  |  |
| <i>CD320</i>     |  |  |  |
| <i>PELO</i>      |  |  |  |
| <i>ATAT1</i>     |  |  |  |
| <i>MFN2</i>      |  |  |  |
| <i>XRCC4</i>     |  |  |  |
| <i>STARD7</i>    |  |  |  |
| <i>GIGYF2</i>    |  |  |  |
| <i>HSPA1B</i>    |  |  |  |
| <i>MLLT1</i>     |  |  |  |
| <i>TACC3</i>     |  |  |  |
| <i>CPLX3</i>     |  |  |  |
| <i>KIDINS220</i> |  |  |  |
| <i>PNMA2</i>     |  |  |  |
| <i>PDCD4</i>     |  |  |  |
| <i>IRF2BP2</i>   |  |  |  |
| <i>FAM192A</i>   |  |  |  |
| <i>AKAP1</i>     |  |  |  |
| <i>MAGED2</i>    |  |  |  |
| <i>CENPF</i>     |  |  |  |
| <i>PLXNB2</i>    |  |  |  |
| <i>CCNA2</i>     |  |  |  |
| <i>MACO1</i>     |  |  |  |
| <i>TCF12</i>     |  |  |  |
| <i>TXNRD1</i>    |  |  |  |
| <i>SOD1</i>      |  |  |  |
| <i>SELENOS</i>   |  |  |  |
| <i>RAI1</i>      |  |  |  |
| <i>KPNA2</i>     |  |  |  |
| <i>RRM1</i>      |  |  |  |
| <i>NOSIP</i>     |  |  |  |
| <i>RBMX2</i>     |  |  |  |
| <i>AKAP2</i>     |  |  |  |
| <i>FASTKD1</i>   |  |  |  |
| <i>OGT</i>       |  |  |  |
| <i>TIPIN</i>     |  |  |  |
| <i>PTCD1</i>     |  |  |  |
| <i>AAMP</i>      |  |  |  |
| <i>ITGA6</i>     |  |  |  |
| <i>UBR3</i>      |  |  |  |
| <i>C12orf57</i>  |  |  |  |
| <i>SLC6A11</i>   |  |  |  |
| <i>TAF7</i>      |  |  |  |
| <i>CHMP5</i>     |  |  |  |
| <i>ABCB6</i>     |  |  |  |
| <i>CDCA2</i>     |  |  |  |
| <i>FAM91A1</i>   |  |  |  |
| <i>GNAI3</i>     |  |  |  |
| <i>SRGAP2</i>    |  |  |  |
| <i>ANAPC1</i>    |  |  |  |

|                 |  |  |  |
|-----------------|--|--|--|
| <i>BCAM</i>     |  |  |  |
| <i>MPHOSPH8</i> |  |  |  |
| <i>AFAP1</i>    |  |  |  |
| <i>PHF23</i>    |  |  |  |
| <i>CTNND1</i>   |  |  |  |
| <i>CDK12</i>    |  |  |  |
| <i>RRBP1</i>    |  |  |  |
| <i>MORF4L1</i>  |  |  |  |
| <i>COPRS</i>    |  |  |  |
| <i>MAGED1</i>   |  |  |  |
| <i>SMIM4</i>    |  |  |  |
| <i>BTF3</i>     |  |  |  |
| <i>EEF2K</i>    |  |  |  |
| <i>CAMSAP3</i>  |  |  |  |
| <i>PRRC2B</i>   |  |  |  |
| <i>TIMM8B</i>   |  |  |  |
| <i>MLF2</i>     |  |  |  |
| <i>RNF220</i>   |  |  |  |
| <i>GAP43</i>    |  |  |  |
| <i>CDC20</i>    |  |  |  |
| <i>ADAMTS4</i>  |  |  |  |
| <i>ACBD6</i>    |  |  |  |
| <i>MAP7D1</i>   |  |  |  |
| <i>PRKACA</i>   |  |  |  |
| <i>HES1</i>     |  |  |  |
| <i>YME1L1</i>   |  |  |  |
| <i>LSM14B</i>   |  |  |  |
| <i>ARHGEF10</i> |  |  |  |
| <i>TK1</i>      |  |  |  |
| <i>PET100</i>   |  |  |  |
| <i>SDCCAG8</i>  |  |  |  |
| <i>TPX2</i>     |  |  |  |
| <i>WARS2</i>    |  |  |  |
| <i>LARP4</i>    |  |  |  |
| <i>KMT2D</i>    |  |  |  |
| <i>MLLT10</i>   |  |  |  |
| <i>PAM16</i>    |  |  |  |
| <i>NUDT11</i>   |  |  |  |
| <i>SLK</i>      |  |  |  |
| <i>UCK2</i>     |  |  |  |
| <i>DUSP9</i>    |  |  |  |
| <i>DNAJA1</i>   |  |  |  |
| <i>PCLAF</i>    |  |  |  |
| <i>CNTN1</i>    |  |  |  |
| <i>MAP1A</i>    |  |  |  |
| <i>PIK3R4</i>   |  |  |  |
| <i>GNL3L</i>    |  |  |  |
| <i>AMBRA1</i>   |  |  |  |
| <i>AURKB</i>    |  |  |  |
| <i>VPS26B</i>   |  |  |  |
| <i>TRAM1</i>    |  |  |  |
| <i>UPF3A</i>    |  |  |  |

|                  |  |  |  |
|------------------|--|--|--|
| <i>PAIP1</i>     |  |  |  |
| <i>DNAJC15</i>   |  |  |  |
| <i>GMNN</i>      |  |  |  |
| <i>SUZ12</i>     |  |  |  |
| <i>KLF16</i>     |  |  |  |
| <i>HOOK1</i>     |  |  |  |
| <i>GIPC1</i>     |  |  |  |
| <i>PLD3</i>      |  |  |  |
| <i>RBP3</i>      |  |  |  |
| <i>APBB2</i>     |  |  |  |
| <i>DNA2</i>      |  |  |  |
| <i>NOTCH2</i>    |  |  |  |
| <i>SLC4A2</i>    |  |  |  |
| <i>FRMPD2</i>    |  |  |  |
| <i>EIF4ENIF1</i> |  |  |  |
| <i>CCNB1</i>     |  |  |  |
| <i>NRP2</i>      |  |  |  |
| <i>TCAF1</i>     |  |  |  |
| <i>ABCA3</i>     |  |  |  |
| <i>LGALS3BP</i>  |  |  |  |
| <i>NRCAM</i>     |  |  |  |
| <i>GOLM1</i>     |  |  |  |
| <i>BRD2</i>      |  |  |  |
| <i>MOCS2</i>     |  |  |  |
| <i>SCARA3</i>    |  |  |  |
| <i>SAPCD2</i>    |  |  |  |
| <i>SLC1A5</i>    |  |  |  |
| <i>GTSE1</i>     |  |  |  |
| <i>DLGAP5</i>    |  |  |  |
| <i>IRS1</i>      |  |  |  |
| <i>SHROOM3</i>   |  |  |  |
| <i>LMBRD2</i>    |  |  |  |
| <i>TMEM160</i>   |  |  |  |
| <i>MORF4L2</i>   |  |  |  |
| <i>RNF14</i>     |  |  |  |
| <i>C18orf25</i>  |  |  |  |
| <i>HELLS</i>     |  |  |  |
| <i>C8orf59</i>   |  |  |  |
| <i>UBE2T</i>     |  |  |  |
| <i>ANLN</i>      |  |  |  |
| <i>CST3</i>      |  |  |  |
| <i>DOCK6</i>     |  |  |  |
| <i>SLC39A10</i>  |  |  |  |
| <i>PEG10</i>     |  |  |  |
| <i>PNMA8A</i>    |  |  |  |
| <i>STMN3</i>     |  |  |  |
| <i>SQLE</i>      |  |  |  |
| <i>IGFBP2</i>    |  |  |  |
| <i>SCD</i>       |  |  |  |
| <i>EPHB4</i>     |  |  |  |
| <i>SLC29A1</i>   |  |  |  |
| <i>MRFAP1</i>    |  |  |  |



|                  |  |  |  |
|------------------|--|--|--|
| <i>AUTS2</i>     |  |  |  |
| <i>HSBP1</i>     |  |  |  |
| <i>CCND3</i>     |  |  |  |
| <i>PKMYT1</i>    |  |  |  |
| <i>C14orf119</i> |  |  |  |
| <i>FTL</i>       |  |  |  |
| <i>SLC29A2</i>   |  |  |  |
| <i>CLU</i>       |  |  |  |
| <i>OBSL1</i>     |  |  |  |
| <i>DNAJB14</i>   |  |  |  |
| <i>SERPINF1</i>  |  |  |  |
| <i>NKIRAS1</i>   |  |  |  |
| <i>ZZEF1</i>     |  |  |  |
| <i>FADS2</i>     |  |  |  |
| <i>HECTD1</i>    |  |  |  |

| Supplementary Table 3 Up-regulated genes (URG) |  |  |  |
|------------------------------------------------|--|--|--|
| Gene Symbol                                    |  |  |  |
| <i>MCEE</i>                                    |  |  |  |
| <i>EIF4A2</i>                                  |  |  |  |
| <i>ZBTB1</i>                                   |  |  |  |
| <i>RRM2</i>                                    |  |  |  |
| <i>NGLY1</i>                                   |  |  |  |
| <i>TMSB4X</i>                                  |  |  |  |
| <i>HMGCL</i>                                   |  |  |  |
| <i>POLB</i>                                    |  |  |  |
| <i>PCK2</i>                                    |  |  |  |
| <i>TMEM41B</i>                                 |  |  |  |
| <i>NCOR1</i>                                   |  |  |  |
| <i>CASC3</i>                                   |  |  |  |
| <i>FHOD1</i>                                   |  |  |  |
| <i>RPS19BP1</i>                                |  |  |  |
| <i>PARP1</i>                                   |  |  |  |
| <i>DUSP3</i>                                   |  |  |  |
| <i>NOL7</i>                                    |  |  |  |
| <i>ACBD7</i>                                   |  |  |  |
| <i>TGOLN2</i>                                  |  |  |  |
| <i>PPA2</i>                                    |  |  |  |
| <i>SNX6</i>                                    |  |  |  |
| <i>UBXN7</i>                                   |  |  |  |
| <i>NUDCD2</i>                                  |  |  |  |
| <i>PDLIM7</i>                                  |  |  |  |
| <i>NT5C</i>                                    |  |  |  |
| <i>MTX3</i>                                    |  |  |  |
| <i>ATP5IF1</i>                                 |  |  |  |
| <i>FNDC3A</i>                                  |  |  |  |
| <i>BCKDHA</i>                                  |  |  |  |
| <i>ICAM5</i>                                   |  |  |  |
| <i>SUCLG1</i>                                  |  |  |  |
| <i>PPIL1</i>                                   |  |  |  |
| <i>KMT2A</i>                                   |  |  |  |
| <i>IMPACT</i>                                  |  |  |  |
| <i>PLPP6</i>                                   |  |  |  |
| <i>SAMM50</i>                                  |  |  |  |
| <i>TMEM245</i>                                 |  |  |  |
| <i>HSD17B8</i>                                 |  |  |  |
| <i>DBT</i>                                     |  |  |  |
| <i>S100A13</i>                                 |  |  |  |
| <i>NAGA</i>                                    |  |  |  |
| <i>MSI1</i>                                    |  |  |  |
| <i>HARS2</i>                                   |  |  |  |
| <i>MRPS12</i>                                  |  |  |  |
| <i>C11orf68</i>                                |  |  |  |
| <i>ACADS</i>                                   |  |  |  |
| <i>MRPL12</i>                                  |  |  |  |
| <i>NDUFAF7</i>                                 |  |  |  |
| <i>PD XK</i>                                   |  |  |  |

|               |  |  |  |
|---------------|--|--|--|
| <i>DDRGK1</i> |  |  |  |
| <i>RNF114</i> |  |  |  |
| <i>OXCT1</i>  |  |  |  |
| <i>SYP</i>    |  |  |  |
| <i>CDKN2C</i> |  |  |  |
| <i>NOP56</i>  |  |  |  |
| <i>ZNF768</i> |  |  |  |
| <i>WDFY1</i>  |  |  |  |
| <i>ECH1</i>   |  |  |  |
| <i>APRT</i>   |  |  |  |
| <i>GSTP1</i>  |  |  |  |
| <i>TPI1</i>   |  |  |  |
| <i>SUCLG2</i> |  |  |  |
| <i>SFPQ</i>   |  |  |  |
| <i>RING1</i>  |  |  |  |
| <i>ACO2</i>   |  |  |  |
| <i>ALDH2</i>  |  |  |  |
| <i>C1QBP</i>  |  |  |  |
| <i>CD276</i>  |  |  |  |
| <i>CARS</i>   |  |  |  |
| <i>PSAT1</i>  |  |  |  |
| <i>MRPL46</i> |  |  |  |
| <i>TBCC</i>   |  |  |  |
| <i>H1FX</i>   |  |  |  |
| <i>PSPC1</i>  |  |  |  |
| <i>CBR4</i>   |  |  |  |
| <i>EML2</i>   |  |  |  |
| <i>ILKAP</i>  |  |  |  |

Supplementary Table 4 Corrected CERES scores of DRG

| Corrected CERES score (19Q1) |             |                                |                                |                             |                             |               |                                  |
|------------------------------|-------------|--------------------------------|--------------------------------|-----------------------------|-----------------------------|---------------|----------------------------------|
| Expression (log2FC)          | Gene Symbol | D283MED CENTRAL NERVOUS SYSTEM | D341MED CENTRAL NERVOUS SYSTEM | D425 CENTRAL NERVOUS SYSTEM | D458 CENTRAL NERVOUS SYSTEM | Count fo Neg. | Summerization                    |
| -1.220645402                 | CLASP2      | #N/A                           | #N/A                           | #N/A                        | #N/A                        | 0             | #N/A                             |
| -1.369708976                 | PPP1R9B     | #N/A                           | #N/A                           | #N/A                        | #N/A                        | 0             | Neg. in at least 2 cell lines    |
| -1.443654669                 | CCDC22      | #N/A                           | #N/A                           | #N/A                        | #N/A                        | 0             | Neg. in less than one cell lines |
| -1.692041526                 | MAGED2      | #N/A                           | #N/A                           | #N/A                        | #N/A                        | 0             |                                  |
| -1.70812897                  | MACO1       | #N/A                           | #N/A                           | #N/A                        | #N/A                        | 0             |                                  |
| -1.729549487                 | SELENOS     | #N/A                           | #N/A                           | #N/A                        | #N/A                        | 0             |                                  |
| -1.753692227                 | RBMX2       | #N/A                           | #N/A                           | #N/A                        | #N/A                        | 0             |                                  |
| -1.789499347                 | OGT         | #N/A                           | #N/A                           | #N/A                        | #N/A                        | 0             |                                  |
| -1.91080449                  | SIRGAP2     | #N/A                           | #N/A                           | #N/A                        | #N/A                        | 0             |                                  |
| -1.984535992                 | MAGED1      | #N/A                           | #N/A                           | #N/A                        | #N/A                        | 0             |                                  |
| -2.218451136                 | NUDT11      | #N/A                           | #N/A                           | #N/A                        | #N/A                        | 0             |                                  |
| -2.242308801                 | DUSP9       | #N/A                           | #N/A                           | #N/A                        | #N/A                        | 0             |                                  |
| -2.264882523                 | PCLAF       | #N/A                           | #N/A                           | #N/A                        | #N/A                        | 0             |                                  |
| -2.31936043                  | GNL3L       | #N/A                           | #N/A                           | #N/A                        | #N/A                        | 0             |                                  |
| -2.578040589                 | DNA2        | #N/A                           | #N/A                           | #N/A                        | #N/A                        | 0             |                                  |
| -2.727597628                 | TCAF1       | #N/A                           | #N/A                           | #N/A                        | #N/A                        | 0             |                                  |
| -3.044914742                 | MORFAL2     | #N/A                           | #N/A                           | #N/A                        | #N/A                        | 0             |                                  |
| -3.260513129                 | PNMABA      | #N/A                           | #N/A                           | #N/A                        | #N/A                        | 0             |                                  |
| -4.099317134                 | DNAJB14     | 0.120873238                    | 0.059658862                    | 0.115506904                 | 0.061139225                 | 0             |                                  |
| -3.953343965                 | FTL         | 0.020755994                    | 0.150977771                    | 0.025035229                 | 0.093267243                 | 0             |                                  |
| -3.393468792                 | IGFBP2      | 0.139236598                    | 0.171514938                    | 0.257854951                 | 0.333812959                 | 0             |                                  |
| -3.009117412                 | LMBRD2      | 0.038702056                    | 0.076900321                    | 0.051846509                 | 0.133578882                 | 0             |                                  |
| -2.544970618                 | APBB2       | 0.066314767                    | 0.062097633                    | 0.079651761                 | 0.056722841                 | 0             |                                  |
| -2.392123305                 | TRAM1       | 0.248423396                    | 0.160349945                    | 0.17638758                  | 0.168663422                 | 0             |                                  |
| -2.388320068                 | VPS26B      | 0.04532003                     | 0.006150822                    | 0.070484019                 | 0.009786266                 | 0             |                                  |
| -2.2969374                   | MAP1A       | 0.019683617                    | 0.097038316                    | 0.014850519                 | 0.071058831                 | 0             |                                  |
| -2.122875949                 | ARHGAP10    | 0.003166377                    | 0.118488379                    | 0.110557238                 | 0.102636138                 | 0             |                                  |
| -2.12242617                  | LSM14B      | 0.014181875                    | 0.097963231                    | 0.264235527                 | 0.113603998                 | 0             |                                  |
| -2.071956059                 | GAP43       | 0.043435222                    | 0.261798869                    | 0.304376759                 | 0.320119868                 | 0             |                                  |
| -2.002164866                 | EEF2K       | 0.043117226                    | 0.140286332                    | 0.024415731                 | 0.255337082                 | 0             |                                  |
| -1.925074649                 | AFAP1       | 0.036312275                    | 0.083774188                    | 0.026091049                 | 0.131167676                 | 0             |                                  |
| -1.856115592                 | SLC6A11     | 0.122025729                    | 0.084079375                    | 0.062361343                 | 0.109628399                 | 0             |                                  |
| -1.642502248                 | PODCA2      | 0.14678695                     | 0.107823353                    | 0.05623043                  | 0.069045658                 | 0             |                                  |
| -1.46827246                  | GNG12       | 0.018394415                    | 0.076469755                    | 0.022877555                 | 0.028000474                 | 0             |                                  |
| -1.214968625                 | RPGRIPI1    | 0.274855441                    | 0.174182672                    | 0.160933016                 | 0.042077849                 | 0             |                                  |
| -4.032587437                 | CLU         | -0.014696649                   | 0.110022454                    | 0.022369446                 | 0.112649141                 | 1             |                                  |
| -3.257729321                 | PEG10       | 0.164433763                    | 0.04863835                     | -0.221308935                | 0.14553507                  | 1             |                                  |
| -3.066268843                 | C18orf25    | 0.114156991                    | -0.005950746                   | 0.097977464                 | 0.092695716                 | 1             |                                  |
| -2.86156998                  | SCARA3      | -0.036793992                   | 0.060827624                    | 0.147719096                 | 0.015803393                 | 1             |                                  |
| -2.83546084                  | NRCAM       | 0.060519497                    | 0.039422089                    | 0.200959143                 | -0.001047031                | 1             |                                  |
| -2.598308665                 | SLC4A2      | -0.044904327                   | 0.237143819                    | 0.106506936                 | 0.230295108                 | 1             |                                  |
| -2.489489883                 | GIPC1       | -0.044859387                   | 0.016358922                    | 0.264666842                 | 0.142049183                 | 1             |                                  |
| -2.479512715                 | HOOX1       | 0.031754297                    | 0.0611101041                   | -0.211998533                | 0.004148301                 | 1             |                                  |
| -2.423361671                 | DNAUC15     | -0.172731095                   | 0.086869032                    | 0.208873825                 | 0.095754808                 | 1             |                                  |
| -2.323075349                 | AMBRA1      | 0.094660462                    | 0.434763881                    | 0.305754168                 | -0.318154543                | 1             |                                  |
| -2.291992902                 | CNTN1       | 0.151156412                    | 0.023596219                    | 0.082510175                 | -0.024674514                | 1             |                                  |
| -2.144115637                 | SDCCAG8     | -0.060838508                   | 0.106295634                    | 0.113834617                 | 0.214039011                 | 1             |                                  |
| -2.104216488                 | ACBD6       | #N/A                           | 0.149161126                    | 0.161567664                 | -0.034106388                | 1             |                                  |
| -1.985066445                 | SMIM4       | -0.097734638                   | 0.078868292                    | 0.071620513                 | 0.201550292                 | 1             |                                  |
| -1.954948566                 | RBBP1       | 0.095796269                    | 0.061938264                    | -0.127926245                | 0.087064511                 | 1             |                                  |
| -1.943963158                 | CTNND1      | 0.051047021                    | 0.011362186                    | -0.213158237                | 0.096441287                 | 1             |                                  |
| -1.846475814                 | C12orf57    | 0.083820761                    | 0.057599545                    | -0.052203809                | 0.033371114                 | 1             |                                  |
| -1.768201753                 | AKAP2       | 0.194085101                    | 0.016639117                    | 0.118244859                 | -0.023238926                | 1             |                                  |
| -1.704441599                 | PLXNB2      | -0.136769827                   | 0.013598881                    | 0.07899748                  | 0.26810853                  | 1             |                                  |
| -1.641290071                 | PNMA2       | 0.221511361                    | 0.185987103                    | 0.093698567                 | -0.03717369                 | 1             |                                  |
| -1.633537092                 | CPLX3       | 0.168682211                    | 0.15424459                     | -0.171331319                | 0.136950682                 | 1             |                                  |
| -1.561272622                 | GGA2        | 0.070527655                    | 0.040723151                    | 0.150925295                 | -0.035216865                | 1             |                                  |
| -1.52514518                  | MOB1A       | -0.047982458                   | 0.012987409                    | 0.08302459                  | 0.072774449                 | 1             |                                  |
| -1.314486164                 | STK24       | 0.085305698                    | -0.021101778                   | 0.115205679                 | 0.123631837                 | 1             |                                  |
| -1.306093982                 | ZNF148      | 0.001389205                    | 0.147188932                    | -0.039707061                | 0.193978157                 | 1             |                                  |
| -4.945674989                 | FADS2       | -0.271921172                   | -0.171305735                   | 0.002388545                 | 0.00489775                  | 2             |                                  |
| -3.929192694                 | C14orf119   | 0.066211575                    | -0.061537187                   | -0.218200306                | 0.012963205                 | 2             |                                  |
| -3.461460904                 | EPHB4       | 0.097932397                    | -0.031495232                   | -0.032235026                | 0.137034361                 | 2             |                                  |
| -3.085562877                 | HELLS       | 0.016829695                    | -0.078082646                   | 0.017111256                 | -0.115584756                | 2             |                                  |
| -3.037441553                 | TMEM160     | 0.127347932                    | -0.188716133                   | -0.246345362                | 0.042421935                 | 2             |                                  |
| -3.00078743                  | SHROOM3     | -0.058011462                   | -0.072806522                   | 0.020077917                 | 0.012185128                 | 2             |                                  |
| -2.628594666                 | FRMPD2      | 0.044298118                    | -0.07382916                    | -0.039212432                | 0.138678323                 | 2             |                                  |
| -2.597638172                 | NOTCH2      | 0.125557738                    | 0.033379809                    | -0.035730365                | -0.045564156                | 2             |                                  |
| -2.18755351                  | MILL10      | 0.210837391                    | 0.015896633                    | -0.048361642                | -0.054022889                | 2             |                                  |
| -2.123831734                 | PET100      | -0.206079699                   | 0.02425943                     | 0.178528385                 | -0.190261881                | 2             |                                  |
| -2.11302027                  | PRKACA      | -0.298802867                   | -0.118118376                   | 0.000360558                 | 0.01038062                  | 2             |                                  |
| -2.096697446                 | ADAMTS4     | 0.130878666                    | -0.064536324                   | 0.111978658                 | -0.00459508                 | 2             |                                  |
| -2.058306677                 | RNF220      | -0.277978329                   | 0.07181053                     | 0.037837144                 | -0.086449653                | 2             |                                  |
| -2.006648563                 | CAMSAP3     | 0.110453431                    | -0.085334449                   | -0.152987365                | 0.036152787                 | 2             |                                  |
| -1.918947833                 | BCAM        | 0.050940827                    | -0.010734115                   | 0.155592664                 | -0.045635124                | 2             |                                  |
| -1.78526624                  | FASTKD1     | -0.107346213                   | -0.008415516                   | 0.055451499                 | 0.297352634                 | 2             |                                  |
| -1.730155687                 | RAI1        | 0.085586888                    | -0.088203733                   | -0.090395434                | 0.042795166                 | 2             |                                  |
| -1.708364253                 | TCF12       | -0.215054478                   | 0.141718487                    | -0.170123314                | 0.192462187                 | 2             |                                  |
| -1.667659628                 | FAM192A     | -0.07860119                    | -0.079281116                   | 0.066724364                 | 0.035934505                 | 2             |                                  |
| -1.618313371                 | MILLI       | -0.10367468                    | -0.200624784                   | 0.098548001                 | 0.063253595                 | 2             |                                  |
| -1.539289749                 | DDHD2       | 0.203339484                    | 0.060952638                    | -0.082337492                | -0.014653032                | 2             |                                  |
| -1.46021874                  | IMPG2       | 0.282782654                    | -0.101596485                   | 0.021619219                 | -0.00031275                 | 2             |                                  |
| -1.290094358                 | CACNA2D1    | 0.033868928                    | -0.091416369                   | 0.013715107                 | -0.238184874                | 2             |                                  |
| -1.277169376                 | EBF1        | 0.088960228                    | 0.24345093                     | -0.303997974                | -0.114991105                | 2             |                                  |
| -1.204458685                 | NCO1        | 0.051924785                    | -0.025337694                   | 0.15601203                  | -0.047070048                | 2             |                                  |
| -5.138912693                 | HECTD1      | -0.302535281                   | -0.333903578                   | 0.01534559                  | -0.515434111                | 3             |                                  |
| -3.629645467                 | MRFAP1      | -0.100784321                   | -0.03505336                    | -0.082052273                | 0.257988303                 | 3             |                                  |
| -3.49064648                  | SLC29A1     | -0.301502191                   | 0.041304985                    | -0.246502585                | -0.220386452                | 3             |                                  |
| -3.404364143                 | SCD         | 0.006781497                    | -0.181626851                   | -0.371326658                | -0.209956454                | 3             |                                  |
| -3.27450038                  | STMN3       | 0.092209723                    | -0.063277781                   | -0.110296579                | -0.002804746                | 3             |                                  |
| -2.989755198                 | IRS1        | 0.172802365                    | -0.09937819                    | -0.533728363                | -0.149313792                | 3             |                                  |
| -2.888327615                 | SAPCD2      | -0.010253203                   | 0.013042975                    | -0.187628149                | -0.121065882                | 3             |                                  |
| -2.85074025                  | MOCOS2      | -0.012849648                   | -0.018026734                   | -0.206431565                | 0.009039713                 | 3             |                                  |
| -2.843804852                 | BRD2        | -0.389816652                   | -0.476573777                   | -0.238915299                | 0.086495996                 | 3             |                                  |
| -2.841543744                 | GOLM1       | 0.093176747                    | -0.001275463                   | -0.035360081                | -0.031068769                | 3             |                                  |
| -2.737125662                 | ABCA3       | #N/A                           | -0.026040718                   | -0.010317492                | -0.088828046                | 3             |                                  |
| -2.533490486                 | RBP3        | -0.021081274                   | -0.025059046                   | -0.123209422                | 0.033871007                 | 3             |                                  |
| -2.498159463                 | PLD3        | -0.011094217                   | -0.034622191                   | -0.056148544                | 0.062044918                 | 3             |                                  |
| -2.412400202                 | PAIP1       | 0.368016576                    | -0.120294146                   | -0.079741004                | -0.061127915                | 3             |                                  |

|              |           |              |              |              |               |   |
|--------------|-----------|--------------|--------------|--------------|---------------|---|
| -2.242070956 | UCK2      | 0.106790893  | -0.136338338 | -0.161054574 | -0.174722996  | 3 |
| -2.179101369 | KMT2D     | 0.196218833  | -0.521185046 | -0.867776992 | -0.321476527  | 3 |
| -2.115782729 | HES1      | -0.155516252 | -0.204870917 | 0.004552053  | -0.047496305  | 3 |
| -2.110456827 | MAP7D1    | 0.139435695  | -0.15996436  | -0.115216999 | -0.169715128  | 3 |
| -2.043410504 | MLF2      | -0.111206597 | 0.02137321   | -0.209635388 | -0.128484445  | 3 |
| -2.01486126  | PRRC2B    | 0.130221301  | -0.174255657 | -0.045489093 | -0.169823676  | 3 |
| -1.91899205  | MPHOSPH8  | -0.397163774 | -0.129235352 | -0.022148257 | 0.13212157    | 3 |
| -1.907421971 | GNAI3     | -0.095479608 | -0.048120283 | 0.042404613  | -0.031730109  | 3 |
| -1.876770207 | ABC96     | #N/A         | -0.048815596 | -0.043818246 | -0.125221771  | 3 |
| -1.83529286  | UBR3      | 0.170500644  | -0.278591444 | -0.130836644 | -0.000204099  | 3 |
| -1.825843018 | AAMP      | #N/A         | -0.705044536 | -0.770625483 | -0.78087717   | 3 |
| -1.745578084 | NOSIP     | -0.356678337 | -0.213393498 | -0.169079888 | 0.029074958   | 3 |
| -1.730410046 | KPNA2     | -0.321924285 | 0.215624565  | -0.325640638 | -0.068823482  | 3 |
| -1.66956892  | AKA1P     | -0.061316474 | -0.054091228 | -0.206218511 | 0.094006418   | 3 |
| -1.642691276 | IRF2BP2   | -0.079499121 | -0.272382528 | 0.09524385   | -0.14120532   | 3 |
| -1.602906114 | GIGYF2    | -0.09939443  | 0.072689933  | -0.057245577 | -0.081035727  | 3 |
| -1.575357639 | CD320     | 0.016127855  | -0.080428243 | -0.062650023 | -0.0586656384 | 3 |
| -1.546802594 | ANK3      | -0.290544432 | 0.035956804  | -0.187648908 | -0.046322363  | 3 |
| -1.536185675 | SREBF2    | -0.431882109 | -0.004942515 | -0.368675572 | 0.057026745   | 3 |
| -1.530162156 | HSPH1     | 0.031489981  | -0.037358989 | -0.063706769 | -0.023367607  | 3 |
| -1.49516757  | PDCL3     | 0.138369759  | -0.06532273  | -0.161279012 | -0.192559228  | 3 |
| -1.451952087 | RHBDD3    | 0.107246897  | -0.008537805 | -0.210206455 | -0.074071588  | 3 |
| -1.430966047 | EYA3      | -0.153395399 | -0.108911702 | 0.117377343  | -0.092789316  | 3 |
| -1.385976794 | VPSS3     | -0.363090964 | 0.016534109  | -0.200313013 | -0.170807626  | 3 |
| -1.305306722 | PKN2      | 0.226756157  | -0.173115977 | -0.332330988 | -0.141031957  | 3 |
| -4.509561557 | ZZEF1     | -0.14925743  | -0.115236612 | -0.053065928 | -0.016835686  | 4 |
| -4.446872786 | NKIRAS1   | -0.164225682 | -0.081101525 | -0.000739244 | -0.117385032  | 4 |
| -4.165721363 | SERPINF1  | -0.062347185 | -0.009050953 | -0.290109481 | -0.162307385  | 4 |
| -4.074171272 | ORSL1     | -0.448480809 | -0.323839601 | -0.165891989 | -0.295937708  | 4 |
| -3.971063092 | SLC29A2   | -0.05528478  | -0.14329224  | -0.19667589  | -0.094825862  | 4 |
| -3.914176522 | PKMYT1    | -1.035969985 | -0.677467857 | -0.734289004 | -1.000200816  | 4 |
| -3.787818013 | CND3      | -0.103700345 | -0.208356278 | -0.82150884  | -0.330573651  | 4 |
| -3.651358749 | HSBP1     | -0.181846877 | -0.07513838  | -0.331841896 | -0.11252451   | 4 |
| -3.638144    | AUTS2     | -0.263038782 | -0.134671915 | -0.040055824 | -0.114510794  | 4 |
| -3.344934684 | SOLE      | -0.175868049 | -0.009211296 | -0.14372814  | -0.149493223  | 4 |
| -3.248551012 | SLC39A10  | -0.433836073 | -0.531987171 | -0.276441985 | -0.369227283  | 4 |
| -3.211609385 | DCC6      | -0.423256012 | -0.413318777 | -0.189350344 | -0.315483795  | 4 |
| -3.208565406 | CST3      | -0.125640549 | -0.222480201 | -0.130250434 | -0.109614734  | 4 |
| -3.143680506 | ANLN      | -0.748879842 | -0.143018875 | -0.346100024 | -0.343335371  | 4 |
| -3.11108624  | UBE2T     | -0.377657307 | -0.332323899 | -0.30244884  | -0.149141763  | 4 |
| -3.103518162 | C8orf59   | -0.484629446 | -0.578201222 | -0.539184786 | -0.364865074  | 4 |
| -3.061530236 | RNF14     | -0.32807364  | -0.523288629 | -0.529393278 | -0.199901908  | 4 |
| -2.950000848 | DLAGAP5   | -0.102962719 | -0.363316301 | -0.706297307 | -0.633102429  | 4 |
| -2.936518017 | GTSE1     | -0.369214864 | -0.183929658 | -0.360365498 | -0.357899984  | 4 |
| -2.901108704 | SLC1A5    | -0.290085356 | -0.228151687 | -0.138698274 | -0.284419541  | 4 |
| -2.786654511 | LGALS3BP  | -0.378999834 | -0.294672667 | -0.309719647 | -0.227046109  | 4 |
| -2.714665585 | NRP2      | -0.273643734 | -0.183354947 | -0.339183773 | -0.250631769  | 4 |
| -2.71098367  | CCNB1     | -0.868222735 | -0.657184689 | -0.924165756 | -0.692722024  | 4 |
| -2.70739101  | E1FAENF1  | -0.23561542  | -0.038684661 | -0.240627841 | -0.248307311  | 4 |
| -2.478359334 | KLF16     | -0.631510338 | -0.265134807 | -0.074039752 | -0.479633184  | 4 |
| -2.468482825 | SUZ12     | -0.423281272 | -0.264050671 | -0.198427658 | -0.347624286  | 4 |
| -2.458288498 | GMNIN     | -0.607847367 | -0.211976747 | -0.430090532 | -0.143165977  | 4 |
| -2.400863829 | UPF3A     | -0.316640087 | -0.443380832 | -0.404334989 | -0.344244363  | 4 |
| -2.367260595 | AURKB     | -1.379067545 | -1.117275459 | -1.254397175 | -1.378486782  | 4 |
| -2.30807809  | PIK3R4    | -0.243263775 | -0.387962767 | -0.578115618 | -0.272689975  | 4 |
| -2.248463079 | DNAJA1    | -0.629279246 | -0.494929254 | -0.494432681 | -0.304817379  | 4 |
| -2.234394652 | SLK       | -0.02415857  | -0.164082399 | -0.195109031 | -0.062689552  | 4 |
| -2.207197992 | PAM16     | -1.118117342 | -1.210963506 | -1.096028357 | -0.937008987  | 4 |
| -2.175886125 | LARP4     | -0.380412818 | -0.226250139 | -0.266360114 | -0.406809124  | 4 |
| -2.157469214 | WARS2     | -0.237883514 | -0.115203987 | -0.354132322 | -0.421637658  | 4 |
| -2.148429019 | TPX2      | -1.113649074 | -0.827994553 | -0.883607813 | -1.125422593  | 4 |
| -2.122981258 | TK1       | -0.624267133 | -0.06481605  | -0.151556303 | -0.285672147  | 4 |
| -2.11762371  | YME1L1    | -0.028907729 | -0.158851523 | -0.283372382 | -0.150854072  | 4 |
| -2.089645764 | CDC20     | -1.245704853 | -1.229414187 | -1.184565739 | -1.148756966  | 4 |
| -2.018055977 | TMM6B     | -0.142095449 | -0.216278377 | -0.268132887 | -0.160020591  | 4 |
| -2.000301674 | BTF3      | -0.363590924 | -0.365406301 | -0.264268086 | -0.187072948  | 4 |
| -1.969754532 | COPRS     | -0.084785724 | 0.26013754   | -0.338659003 | -0.28450619   | 4 |
| -1.956610639 | MORF4L1   | -0.343946335 | -0.053171946 | -0.027914571 | -0.149528754  | 4 |
| -1.952522019 | CDK12     | -0.196294185 | -0.27904124  | -0.366209195 | -0.340232354  | 4 |
| -1.934679804 | PHF23     | -0.168583035 | -0.260202481 | -0.363997392 | -0.10943819   | 4 |
| -1.912674687 | ANAPC1    | -0.697810932 | -0.64666665  | -0.821427283 | -0.79030814   | 4 |
| -1.906953467 | FAM91A1   | -0.405840582 | -0.015974635 | -0.231039559 | -0.085312996  | 4 |
| -1.88762224  | CDCA2     | -0.022764273 | -0.074310777 | -0.003995301 | -0.014860273  | 4 |
| -1.872292683 | CHMP5     | -0.306093934 | -0.476552506 | -0.447216566 | -0.644195736  | 4 |
| -1.865722786 | TAF7      | -0.898516383 | -0.848076109 | -0.872557997 | -0.825814883  | 4 |
| -1.833471964 | ITGA6     | -0.061268873 | -0.137380499 | -0.061817043 | -0.21363894   | 4 |
| -1.800504575 | PTCD1     | -0.42277225  | -0.101906231 | -0.323455952 | -0.580635957  | 4 |
| -1.797778225 | TIPIN     | -0.63646358  | -0.686676213 | -0.599836312 | -0.75044827   | 4 |
| -1.737418944 | RRM1      | -1.402301356 | -1.384456576 | -1.452092865 | -1.58010686   | 4 |
| -1.721360192 | SOD1      | -1.274285209 | -0.699782688 | -1.20234072  | -1.353549703  | 4 |
| -1.709898432 | TXNRD1    | -0.925574604 | -0.796951981 | -0.402149727 | -0.531493263  | 4 |
| -1.704782339 | CCNA2     | -1.032713953 | -1.036353341 | -0.787120235 | -1.16650094   | 4 |
| -1.702518177 | CENPF     | -0.344822345 | -0.197770337 | -0.246867115 | -0.331758807  | 4 |
| -1.636900027 | KIDINS220 | -0.246147812 | -0.006520249 | -0.147921956 | -0.141226068  | 4 |
| -1.632311568 | TACC3     | -0.361552903 | -0.642763129 | -0.609355972 | -0.540697099  | 4 |
| -1.60798793  | HSPA1B    | -0.082330197 | -0.212422976 | -0.167179313 | -0.202840843  | 4 |
| -1.600779638 | STARD7    | -0.535033076 | -0.403637205 | -0.422780305 | -0.315985638  | 4 |
| -1.591607974 | XRCC4     | -0.263881688 | -0.273064763 | -0.336183908 | -0.433624938  | 4 |
| -1.588980176 | MFN2      | -0.422548489 | -0.310205562 | -0.759669368 | -0.55477673   | 4 |
| -1.584534468 | ATAT1     | -0.144839407 | -0.089287932 | -0.028959337 | -0.156076757  | 4 |
| -1.581826841 | PELO      | -0.664227724 | -0.627005828 | -1.345961113 | -0.637787851  | 4 |
| -1.557521978 | UBE2S     | -0.287274195 | -0.319534772 | -0.429977622 | -0.542519514  | 4 |
| -1.542817926 | CLPTM1    | -0.141207205 | -0.137380133 | -0.097270996 | -0.174382494  | 4 |
| -1.512864108 | SPATS2L   | -0.057400904 | -0.12381207  | -0.100888974 | -0.009833866  | 4 |
| -1.502318113 | TOR1AIP2  | -0.290959597 | -0.087794807 | -0.081397827 | -0.140965451  | 4 |
| -1.487273326 | ACLY      | -0.135278915 | -0.279317851 | -0.230399727 | -0.307646482  | 4 |
| -1.472928297 | HK2       | -0.212856695 | -0.512796898 | -0.360251508 | -0.512858971  | 4 |
| -1.453392356 | MTDH      | -0.092830886 | -0.086730268 | -0.129244093 | -0.102731594  | 4 |
| -1.438391163 | STAU1     | -0.144680375 | -0.003091348 | -0.118806622 | -0.056791648  | 4 |
| -1.430217143 | SNAP23    | -0.827956555 | -0.424032084 | -0.846069188 | -0.741865398  | 4 |
| -1.412525599 | BSG       | -0.266060311 | -0.19671323  | -0.584003522 | -0.273096899  | 4 |
| -1.396587557 | SPAG5     | -0.290737691 | -0.19855447  | -0.156322763 | -0.237360569  | 4 |
| -1.38498825  | HSPA8     | -0.300893999 | -0.414580288 | -0.434010497 | -0.239829564  | 4 |
| -1.373239248 | SCAF4     | -0.215486833 | -0.227886043 | -0.592155159 | -0.239880871  | 4 |

|              |                 |              |              |              |              |   |  |
|--------------|-----------------|--------------|--------------|--------------|--------------|---|--|
| -1.366234209 | <i>LIMD1</i>    | -0.144008463 | -0.254065896 | -0.265723061 | -0.353869244 | 4 |  |
| -1.357158146 | <i>DHDDS</i>    | -0.812828603 | -1.033502637 | -1.002175774 | -0.931962125 | 4 |  |
| -1.351888595 | <i>ANAPC5</i>   | -0.762265657 | -0.70535939  | -0.774459545 | -0.732985082 | 4 |  |
| -1.342825857 | <i>RNF20</i>    | -0.562108559 | -0.502477865 | -0.469915709 | -0.481619383 | 4 |  |
| -1.341844183 | <i>POLR2B</i>   | -1.019688475 | -1.229606212 | -1.191230153 | -1.270290241 | 4 |  |
| -1.337675569 | <i>KIAA1143</i> | -0.34649746  | -0.240392858 | -0.197331768 | -0.182907637 | 4 |  |
| -1.327789269 | <i>COPE</i>     | -0.80745016  | -0.803157508 | -1.140183519 | -0.907409479 | 4 |  |
| -1.320597751 | <i>EIF4G1</i>   | -0.755631896 | -0.628853159 | -0.902381967 | -0.686470069 | 4 |  |
| -1.305456953 | <i>LARP1</i>    | -0.361152854 | -0.337170993 | -0.074652787 | -0.62458849  | 4 |  |
| -1.302433365 | <i>MAX</i>      | -0.479703923 | -0.443319062 | -0.474743215 | -0.596605968 | 4 |  |
| -1.268186405 | <i>NES</i>      | -0.15825527  | -0.184496811 | -0.371846102 | -0.339236815 | 4 |  |
| -1.244606112 | <i>KIAA0391</i> | -0.483053862 | -0.219716584 | -0.51633775  | -0.718718085 | 4 |  |
| -1.239088178 | <i>CHCHD2</i>   | -0.457118721 | -0.404499414 | -0.546703148 | -0.339641515 | 4 |  |
| -1.237106443 | <i>POLR3E</i>   | -0.698514592 | -0.75842631  | -0.740622895 | -0.670102665 | 4 |  |
| -1.211458644 | <i>CSDE1</i>    | -0.399370518 | -0.139678366 | -0.345090937 | -0.292973533 | 4 |  |
| -1.202278421 | <i>PPM1H</i>    | -0.175061133 | -0.089041554 | -0.073913747 | -0.060664314 | 4 |  |
| -1.200598168 | <i>PRRC2C</i>   | -0.101842914 | -0.18734038  | -0.211696743 | -0.048175105 | 4 |  |
